# Supplementary material for: Heterogeneity in core-mantle heat flow influenced the ancient geodynamo
Source: Research Square preprint supplement (doi:10.21203/rs.3.rs-6314721/v1), 2025-05-02
Supplement: Supplementary file 1 [file 5e208f681538593845da27dd.xlsx]

## Sheet: Summary
Time period	Nlocalities	Nlocalities (lm ≤ +/-30°)	Nsites_median	S|30|median (°)	S|30|iqr (°)
0-5 Ma	45	21	29	11.3 +2.2 / -1.4	4.4 +1.4 / -1.9
5-265 Ma	76	28	31	14.7 +1.3 / -3.3	6.3 +3.5 / -2.7
5-23 Ma	27	12	32.5	15.3726	6.17895
24-84 Ma	17	5	40	13.8777	7.48869
80-118 Ma	11	3	24	10.3	6.825
126-183 Ma	10	4	58	11	4.25
200-265 Ma	11	4	25	14.35	6.6
271-321 Ma	7	4	42.5	9.1	2.25
0.5-1.5 Ga	8	7	31	12.3	2.65
1.5-2.9 Ga	8	3	63	7.9	2.7
For individual localites and references see individual worksheets

## Sheet: 0-5 Ma
LocalityID	N	Maglat	S
100080	111	-71.8064	25.3767
100077	35	-52.128	18.0454		de Oliveira, W. P., et al. (2021), Paleosecular Variation and the Time-Averaged Geomagnetic Field Since 10 Ma, Geochemistry, Geophysics, Geosystems, 22(10), e2021GC010063, doi:https://doi.org/10.1029/2021GC010063.
100076	25	-47.9424	21.1937
100075	33	-46.0676	14.9746
100072	34	-39.3772	12.7239
100069	28	-36.832	12.4917
100073	22	-34.0014	7.42782
100067	22	-27.8164	10.8894
100065	108	-20.2801	13.4744
100063	43	-9.75984	12.9302
100062	26	-7.2214	9.94343
100059	45	-3.38357	12.3885
100058	28	-3.17435	11.304
100061	44	-0.727998	8.29586
100057	31	-0.558384	9.2006
100060	58	-0.373243	8.75537
100056	42	1.95953	10.4616
100055	29	8.23378	14.7785
100038	76	13.2955	7.76569
100045	20	15.7131	15.4037
100042	31	15.9095	14.6138
100053	20	16.3889	9.53463
100051	27	17.4002	13.742
100049	29	18.9351	7.99627
100046	27	22.5276	14.3575
100037	27	23.5227	14.9116
100029	38	24.8828	10.1602
100023	20	28.9296	12.2556
100021	30	31.4337	15.1913
100026	43	32.7049	14.6644
100024	33	36.6562	15.1163
100014	57	39.1514	14.2667
100016	37	41.2991	17.9273
100015	20	41.9694	16.8172
100012	65	45.1862	25.8558
100011	70	46.532	15.6146
100010	20	48.7863	13.4426
100013	20	49.1863	14.0678
100008	67	52.0903	13.6941
100009	48	54.02	15.247
100007	50	62.9385	18.1126
100003	44	64.5955	18.8752
100006	22	65.1227	12.7883
100005	64	67.6145	21.7546
100002	23	71.3204	23.6101

## Sheet: 5-23 Ma
LocalityID	N	Maglat	S
40	21	-44.0775	19.4854
44	27	-43.5783	21.6482		Engbers, Y. A., R. K. Bono, and A. J. Biggin (2022), PSVM: A global database for the Miocene indicating elevated paleosecular variation relative to the last 10 Myrs, Geophys J Int, 23, e2022GC010480.
39	28	-35.8195	30.9764
42	46	-35.2807	17.3499
35	20	-19.2949	16.2912
36	37	-12.7482	20.0928
33	38	-3.14736	11.0761
31	21	-3.09339	26.001
29	32	3.76396	14.9638
28	34	8.09639	15.7815
22	86	10.8363	29.2175
25	37	16.0559	9.5971
27	22	21.6468	20.4596
20	24	22.0663	14.6724
19	28	23.8986	14.9038
23	30	24.5614	13.5222
18	154	30.8143	16.9468
17	32	31.0972	19.5767
15	29	32.7059	21.4309
21	54	33.0625	33.8015
10	29	38.0924	18.1192
9	20	38.327	9.58333
8	81	38.9144	18.7863
6	82	43.4211	18.9668
5	27	44.851	20.0491
4	31	46.1929	22.7942
1	52	62.0776	26.2949

## Sheet: 24-84 Ma
LocalityID	N	Maglat	S
35	41	0.513848	13.8777
5	196	1.12177	15.4181		Engbers, Y. A., D. Thallner, R. K. Bono, C. J. Sprain, M. J. Murray, K. Bristol, B. Handford, T. Torsvik, and A. J. Biggin (2024), A Global Paleosecular Variation Database for the Paleogene: Stationary Secular Variation Behavior Since the Triassic?, Geochemistry, Geophysics, Geosystems, 25(6), e2023GC011203, doi:https://doi.org/10.1029/2023GC011203.
28	40	17.2023	5.7625
43	24	21.8131	19.4218
6	21	26.0539	9.98626
31	126	30.9606	14.6365
19	37	35.9839	21.5721
32	20	36.9139	21.1268
45	24	-36.9474	9.62197
42	24	40.52	15.8879
11	71	41.7453	20.0757
3	71	-41.7506	22.1928
41	29	43.8455	22.5408
37	37	47.1672	13.9355
40	227	-50.5707	19.0807
29	100	68.2202	32.5577
30	23	-70.4602	10.3856

## Sheet: 80-118 Ma
LocalityID	N	Maglat	S
NPW17-22	66	-44.9	11
NPW17-36	43	-41.1	12.8		Doubrovine, P. V., T. Veikkolainen, L. Pesonen, E. Piispa, S. Ots, A. V. Smirnov, E. V. Kulakov, and A. J. Biggin (2019), Latitude dependence of geomagnetic paleosecular variation and its relation to the frequency of magnetic reversals: Observations from the Cretaceous and Jurassic, Geochem Geophy Geosy, 20, 1240-1279, doi:10.1029/2018GC007863.
NPW17-53	24	-10	8.3
NPW17-38	21	24.5	10.3
NPW17-24	52	29.8	17.4
NPW17-61	31	39.5	9.9
NPW17-31	21	44.5	15.3
NPW17-69	54	45.3	16.6
NPW17-71	26	45.3	13.1
NPW17-25	33	49.6	15.9
NPW17-29	37	71.9	20.8

## Sheet: 126-183 Ma
LocalityID	N	Maglat	S
NPW17-03	21	-68.3	14.1
NPW17-14	26	-48.5	16.8
NPW17-02	23	-41.6	13.3		Doubrovine, P. V., T. Veikkolainen, L. Pesonen, E. Piispa, S. Ots, A. V. Smirnov, E. V. Kulakov, and A. J. Biggin (2019), Latitude dependence of geomagnetic paleosecular variation and its relation to the frequency of magnetic reversals: Observations from the Cretaceous and Jurassic, Geochem Geophy Geosy, 20, 1240-1279, doi:10.1029/2018GC007863.
NPW17-47	98	-34.2	13.2
NPW17-10	65	-25.1	14.7
NPW17-12	558	-23.4	11.6
NPW17-06	20	-21	10.4
NPW17-16	51	19.3	7.4
NPW17-59	23	36.3	11.8
NPW17-07	35	40	17.5

## Sheet: 200-265 Ma
LocalityID	N	Maglat	S
PT21	41	-47.5	12.2
PT09	40	-42.5	14.8
PT20	40	-40.7	11.9		Handford, B. T., A. J. Biggin, M. M. Haldan, and C. G. Langereis (2021), Analysing Triassic and Permian Geomagnetic Palaeosecular Variation and the Implications for Ancient Field Morphology, Geochem Geophy Geosy, 22, e2021GC009930.
PT04	20	19.9	16.1
PT01	28	23.6	12.6
PT07	22	23.9	10.6
PT12	63	24.9	20.3
PT18	42	57.1	15.6
PT02	241	61	25.2
PT19	24	62.7	17
PT17	76	72.1	14.1

## Sheet: 271-321 Ma
LocalityID	N	Maglat	S
K09	49	-62.8	26.2
K14	23	-3	8.9		Handford, B. T., A. J. Biggin, M. M. Haldan, and C. G. Langereis (2021), Analysing Triassic and Permian Geomagnetic Palaeosecular Variation and the Implications for Ancient Field Morphology, Geochem Geophy Geosy, 22, e2021GC009930.
K04	48	20.2	9.3
K03	37	23	5.6
K05	55	23	9.7
K12	20	30.7	9.6
K01	88	37.1	9.6

## Sheet: 0.5-1.5 Ga
LocalityID	N	Maglat	S
80002	37	0.9	10.8
80008	27	4.5	13		Veikkolainen, T., and L. J. Pesonen (2014), Palaeosecular variation, field reversals and the stability of the geodynamo in the Precambrian, Geophys J Int, 199(3), 1515-1526, doi:10.1093/Gji/Ggu348.
80007	28	16.9	13.7
80004	31	19	12.3
80006	29	26.3	16.7
80001	43	27	7.9
80003	33	27.7	11.1
80005	29	50.8	19

## Sheet: 1.5-2.9 Ga
LocalityID	N	Maglat	S
90001	123	8.8	9.8
90006	23	10.2	6.2		Veikkolainen, T., and L. J. Pesonen (2014), Palaeosecular variation, field reversals and the stability of the geodynamo in the Precambrian, Geophys J Int, 199(3), 1515-1526, doi:10.1093/Gji/Ggu348.
90002	63	13.9	7.9
90007	20	43.6	14.4
90004	46	51	17.7
90005	24	56	16.1
90008	20	56.2	16.8
90003	57	72.2	18.4

[truncated: 1 more sheets: 5-264 Ma]
